# Supplementary material
Source: publisher figshare collection journal article supplement (https://sage.figshare.com/ndownloader/files/24163591)
Supplement: Supplementary file 1 [file 24163591]

## Supplement 1: ICD-10 codes for ambulatory care sensitive conditions

| Class                   | Ambulatory care sensitive condition             | ICD-10-codes                                                                                   | Other                                                              |
|-------------------------|-------------------------------------------------|------------------------------------------------------------------------------------------------|--------------------------------------------------------------------|
| VACCINE-<br>PREVENTABLE | Bacterial pneumonia and influenza               | J10, J11, J13, J14, J15.3, J15.4, J15.7, J15.9, J16.8, J18.1, J18.8                            | In any diagnosis field, not D57                                    |
|                         | Immunization related and preventable conditions | A35, A36, A37, A80, B05, B06, B16.1, B16.9, B18.0, B18.1, B26, G00.0, M01.4                    | In any diagnosis field                                             |
| CHRONIC                 | Angina pectoris                                 | I20, I24.0, I24.8, I24.9                                                                       | Only as primary diagnosis, not certain surgical procedures         |
|                         | Diabetes complications                          | E10.0–10.8, E11.0–E11.8, E12.0–12.8, E13.0–13.8, E14.0–14.8                                    | Only as primary diagnosis                                          |
|                         | COPD                                            | J41–J44, J47                                                                                   | Only as primary diagnosis                                          |
|                         | Congestive heart failure                        | I11.0, I50, J81                                                                                | Only as primary diagnosis, no heart procedures                     |
|                         | Epilepsy                                        | G40–41, O15                                                                                    | Only as primary diagnosis                                          |
|                         | Hypertension                                    | I10, I11.9                                                                                     | Only as primary diagnosis, no heart procedures                     |
|                         | Iron deficiency anaemia                         | D50.1–50.9                                                                                     | Only as primary diagnosis                                          |
|                         | Nutritional deficiencies                        | E40–43, E55.0, E64.3                                                                           | Only as primary diagnosis                                          |
| ACUTE                   | Severe ear, nose or throat infection            | H66–67, J02–03, J06, J31.2                                                                     | Only as primary diagnosis                                          |
|                         | Asthma                                          | J45–46                                                                                         | Only as primary diagnosis                                          |
|                         | Convulsions                                     | R56                                                                                            | Only as primary diagnosis                                          |
|                         | Kidney and urinary tract infections             | N10–12, N13.6                                                                                  | Only as primary diagnosis                                          |
|                         | Cellulitis                                      | L03–04, L08.0, L08.8, L88, L98.0                                                               | Only as primary diagnosis, no other procedures not related to skin |
|                         | Dental conditions                               | A69.0, K02–06, K08, K09.8, K09.9, K12, K13                                                     | Only as primary diagnosis                                          |
|                         | Perforated or bleeding ulcer                    | K25.0–25.2, K25.4–25.6, K26.0–26.2, K26.4–26.6, K27.0–27.2, K27.4–27.6, K28.0–28.2, K28.4–28.6 | Only as primary diagnosis                                          |
|                         | Gastroenteritis                                 | K52.2, K52.8, K52.9                                                                            | Only as primary diagnosis                                          |
|                         | Pelvic inflammatory disease                     | N70, N73, N74                                                                                  | Only as primary diagnosis                                          |
|                         | Dehydration                                     | E86                                                                                            | Only as primary diagnosis                                          |
|                         | Acute bronchitis                                | J20                                                                                            | Only as primary diagnosis                                          |
|                         | Gangrene                                        | R02                                                                                            | In any diagnosis field                                             |
